# Supplementary material
Source: publisher site journal article supplement (https://static.cambridge.org/content/id/urn:cambridge.org:id:article:S1052150X19000496/resource/name/S1052150X19000496supp002.pdf)
Supplement: Supplementary file 1 [file S1052150X19000496supp002.pdf]

Torn between Legal Claiming and Privatized Remedy:  
Rights Mobilization against Gold Mining in Chile  
(Rajiv Maher, David Monciardini, and Steffen Böhm)

*Business Ethics Quarterly*, 2020

**SUPPLEMENTARY MATERIALS**

**Websites for Non-Academic Reports, News Sources, and Videos**

Abogada aclara fallo de la Suprema sobre Pascua Lama: “No dice que Barrick no contamina”  
<https://www.elciudadano.cl/medio-ambiente/abogada-aclara-fallo-la-suprema-pascua-lama-no-dice-barrick-no-contamina/12/15/>  
(accessed 16th December 2017)

Asamblea Guasco Alto (2015) Memorandum diagnuita: se confirma que es un instrumento ilegitimo a la medida de pascua lama.  
<http://olca.cl/articulo/nota.php?id=105547>  
(accessed 16th December 2017)

Barrick Allies with NGOs to Alleviate Poverty in Chile’s Atacama Region  
<https://www.barrick.com/news/news-details/2008/Barrick-Allies-with-NGOs-to-Alleviate-Poverty-in-Chiles-Atacama-Region/default.aspx>  
(accessed 8th February, 2018)

Barrick’s Grievance Mechanism Officers Share Experiences, Best Practices and Challenges  
<https://www.barrick.com/news/news-details/2016/Barricks-Grievance-Mechanism-Officers-Share-Experiences-Best-Practices-and-Challenges/default.aspx>  
(accessed 8th February, 2018)

Barrick Gold reaches initial deal with Chilean Indians who opposed Pascua-Lama mine in Andes  
<http://www.foxnews.com/world/2014/05/28/barrick-gold-reaches-initial-deal-with-chilean-indians-who-opposed-pascua-lama.html>  
(accessed 4th May, 2017)

Barrick Provides Update on Pascua-Lama Project  
<http://www.barrick.com/investors/news/news-details/2018/Barrick-Provides-Update-on-Pascua-Lama-Project/default.aspx>  
(accessed 8th February, 2018)

Barrick leading the way in innovative water management  
<http://barrickbeyondborders.com/environment/2012/01/barrick-leading-the-way-in-innovative-water-management/>  
(accessed 15th March, 2017)

Barrick Provides Update on Pascua-Lama Project  
<https://www.barrick.com/news/news-details/2018/Barrick-Provides-Update-on-Pascua-Lama-Project/default.aspx>  
(accessed 20th September, 2018)

Barrick reaches deal with Pascua-Lama opponents

<http://www.cbc.ca/news/business/barrick-reaches-deal-with-pascua-lama-opponents-1.2658240>

(accessed 15th January, 2018)

Barrick Partners With the Danish Institute for Human Rights

<http://www.barrick.com/investors/news/news-details/2012/Barrick-Partners-With-the-Danish-Institute-for-Human-Rights/default.aspx>

(accessed 15th March, 2017)

Barrick Gold 2017 Human Rights Report ‘Advancing Together’

<http://barrick.q4cdn.com/808035602/files/responsibility/2017/Barrick-Human-Rights-Report.pdf>,

(accessed 18th January 2018.)

Behind Barrick’s Pascua-Lama meltdown in the Atacama desert

<https://www.theglobeandmail.com/report-on-business/rob-magazine/high-and-dry/article18134225/?page=all>

(accessed 10th December, 2016).

Business and Human Rights Resource Centre

<https://www.business-humanrights.org/en>

(accessed 10th June, 2017).

Canadian Mining Projects in the Territory of the Diaguitas Huascoaltinos Agricultural Community in Chile. Human Rights Impact Assessment

[https://policy-practice.oxfamamerica.org/static/media/files/Chile\\_HRIA\\_English.pdf](https://policy-practice.oxfamamerica.org/static/media/files/Chile_HRIA_English.pdf)

(accessed 14th December, 2017)

CEDHA (2011). Equator Principles Due Diligence Review Violations by Barrick Gold’s Pascua Lama Project (Argentina & Chile)

[https://www.banktrack.org/download/equator\\_principles\\_due\\_diligence\\_review/cedha\\_251111\\_ep\\_due\\_diligence\\_review.pdf](https://www.banktrack.org/download/equator_principles_due_diligence_review/cedha_251111_ep_due_diligence_review.pdf)

(accessed 14th September, 2018)

Chile's Environmental Court Rejects Claims that Pascua-Lama has Damaged Glaciers

<https://www.barrick.com/news/news-details/2015/Chiles-Environmental-Court-Rejects-Claims-that-Pascua-Lama-has-Damaged-Glaciers/default.aspx>

Citizens’ Tribunal to Pass Judgment on Barrick Gold

<https://miningwatch.ca/news/2006/11/10/citizens-tribunal-pass-judgment-barrick-gold>

(accessed 21st January 2018)

Comunidad de diaguitas huascoaltinos llaman a “no bajar la guardia” ante cierre de Pascua Lama

<https://www.elciudadano.cl/chile/comunidad-diaguitas-huascoaltinos-llaman-no-bajar-la-guardia-ante-cierre-pascua-lama/01/21/>

(accessed 21st January 2018)

Communities express support for Pascua-Lama Project (2007)

<http://barrick.q4cdn.com/808035602/files/pascua-lama/Communities-express-support-for-Pascua-Lama-Project.pdf>

(accessed 5th May, 2017)

Convenio entre Barrick Gold y Diaguita

<https://www.youtube.com/watch?v=jxtnKvkG-C4&t=154s> video documentary, 8 minutes

(accessed 23rd May, 2017)

Corte Suprema invalida autorización de cierre temporal de Pascua Lama Diario Financiero (2014)  
<https://www.df.cl/noticias/empresas/mineria/corte-suprema-invalida-autorizacion-de-cierre-temporal-de-pascua-lama/2017-03-13/211219.html>  
 (accessed 23rd January, 2018)

Coordinadora por la defensa del agua y la vida (2010) “Pascua Lama: Barrick destruye glaciares y usurpa territorios ancestrales”  
<http://www.derechoalagua.cl/mapa-de-conflictos/pascua-lama-barrick-destruye-glaciares-y-usurpa-territorios-ancestrales/>  
 (accessed 4th May, 2017)

ENVIRONMENT-CHILE: Activists Try to Block Start of Pascua Lama Mine. *Inter-Press Service*.  
<http://www.ipsnews.net/2009/05/environment-chile-activists-try-to-block-start-of-pascua-lama-mine/>  
 (Accessed 2nd September, 2016)

Diaguita Agricultural Communities of the Huascoaltinos and Their Members v. Chile, IACHR  
 Petition 415/07, Report 141/09, 30

Diaguitas denuncian que fueron usados por Barrick y que operadores ambientalistas recibieron millonarias sumas de la minera  
<https://www.elciudadano.cl/medio-ambiente/diaguitas-denuncian-fueron-usados-barrick-operadores-ambientalistas-recibieron-millonarias-sumas-la-minera/02/09/>  
 (accessed 9th February, 2018)

El acuerdo entre Barrick Gold y las comunidades indígenas video CNN news interview with Group C lawyer Lorenzo Soto after MoU announcement, 25 minutes  
<https://www.youtube.com/watch?v=tJuX2punplc>  
 (accessed 9th September, 2018)

Ficha del Proyecto: Modificaciones Proyecto Pascua Lama  
[http://seia.sea.gob.cl/seia-web/ficha/fichaPrincipal.php?modo=ficha&id\\_expediente=1048260](http://seia.sea.gob.cl/seia-web/ficha/fichaPrincipal.php?modo=ficha&id_expediente=1048260)  
 (accessed 10th May, 2017)

Financial Post (2016). ‘Barrick Gold takes home Social Responsibility Award’, 9 June,  
<http://business.financialpost.com/legal-post/barrick-gold-takes-home-social-responsibility-award>  
 (accessed 10th February, 2018)

From the archives: Behind Barrick's Pascua-Lama meltdown in the Atacama desert  
<https://www.theglobeandmail.com/report-on-business/rob-magazine/high-and-dry/article18134225/>  
 (accessed 15th September, 2018)

Getting it right: A look at the mine approval process  
<http://barrickbeyondborders.com/mining/2012/01/getting-it-right-a-look-at-the-mine-approval-process/>  
 (accessed 15th March, 2017)

Giving Communities a Voice  
<https://3blmedia.com/News/CSR/Giving-Communities-Voice>  
 (accessed 15th September, 2018)

Gold’s costly dividend, Human Rights Watch (2011)  
<https://www.hrw.org/report/2011/02/01/golds-costly-dividend/human-rights-impacts-papua-new-guineas-porgera-gold-mine>  
 (accessed 9th June, 2018)

Human Rights policy, Barrick Gold

<https://barrick.q4cdn.com/788666289/files/governance/Barrick-Human-Rights-Policy.pdf>

(accessed 10th December, 2017)

Memorándum de entendimiento, Barrick Gold

<https://barricklatam.com/barrick/presencia/pascua-lama/comunidad/memorandum-de-entendimiento/2014-10-10/092526.html>

(accessed 10th December, 2017)

No se acreditó daño a glaciares: Tribunal rechazó demanda contra Compañía Minera Nevada SpA. por proyecto Pascua Lama

<https://www.tribunalambiental.cl/no-se-acredito-dano-a-glaciares-tribunal-rechazo-demanda-contra-compania-minera-nevada-spa-por-proyecto-pascua-lama/>

(accessed 9th December, 2017)

Our Commitment to Human Rights

<http://www.barrick.com/responsibility/society/human-rights/our-commitment/default.aspx>

(accessed 16th March, 2017)

Pascua Lama: Comienzan alegatos por recurso de protección contra Barrick y el Estado por contaminación

<https://www.elciudadano.cl/organizacion-social/pascua-lama-comienzan-alegatos-por-recurso-de-proteccion-contra-barrick-y-el-estado-por-contaminacion/10/19/>

(accessed 9th January, 2018)

Pascua Lama y el afán de borrar los límites

<https://www.ocmal.org/pascua-lama-y-el-afan-de-borrar-los-limites/>

(accessed 14th January, 2018)

PASCUA LAMA: El Llanto de la Montaña, video documentary, 115 minutes

<https://www.youtube.com/watch?v=WZ1dVHHv52k&t=144s>

(accessed 6th May, 2017)

Pascual Lama: El convenio entre Barrick y comunidades diaguitas. CNN news interview with Group C leader and mediator of MoU process after MoU announcement, 20 minutes

[https://www.youtube.com/watch?v=j\\_aZ70c8SZM](https://www.youtube.com/watch?v=j_aZ70c8SZM)

(accessed 10th September, 2018)

Proceso de Trabajo del Pueblo Diaguita (Valle del Huasco)

<https://www.youtube.com/watch?v=CzaZTjoQ8pM&t=1604s> (accessed 19th August, 2017)

Protest Barrick

<http://protestbarrick.net/article.php?id=570.html>

Real-Time Water Monitoring Promotes Transparency At Pascua-Lama

<https://www.barrick.com/news/news-details/2017/Real-Time-Water-Monitoring-Promotes-Transparency-At-Pascua-Lama/default.aspx>

(accessed 10th September, 2018)

Special report on Pascua Lama

<http://barrickbeyondborders.com/mining/2009/09/a-special-report-on-pascua-lama/>

(accessed 15th March, 2017)

Sed de oro - video documentary, 74 minutes

[https://www.youtube.com/watch?v=\\_gLi277sb4](https://www.youtube.com/watch?v=_gLi277sb4)

(accessed 14th March, 2017)

Total rechazo a proyecto Pascua Lama en encuesta de

[www.chanarcillo.cl](http://www.chanarcillo.cl) [http://chanarcillo.cl/notas\\_ver.php?idnota=1243](http://chanarcillo.cl/notas_ver.php?idnota=1243)

(accessed 10th May, 2017)

Tribunal escuchó alegatos en reclamación contra la Superintendencia del Medio Ambiente por rechazar Programa de Cumplimiento Ambiental de Pascua Lama

<https://www.tribunalambiental.cl/minera-alega-contra-la-resolucion-en-que-la-superintendencia-rechazo-el-programa-de-cumplimiento-ambiental-de-pascua-lama/>

(accessed 10th May, 2017)

UPDATE 3-Barrick strikes deal with Pascua-Lama mine opponents

<https://www.reuters.com/article/barrick-gold-pascua/update-3-barrick-strikes-deal-with-pascua-lama-mine-opponents-idUSL1N0OE0PS20140528>

(accessed 10th September, 2018)
